# Supplementary material for: Synthesis, electrochromic, halochromic and electro-optical properties of polyazomethines with a carbazole core and triarylamine units serving as functional groups
Source: Royal Society of Chemistry journal article supplement (doi:10.1039/c4tc02400a), 2015-01-01
Supplement: c4tc02400a1.pdf [file c4tc02400a1.pdf]

## Supporting information

### Captions:

Fig. S1. The  $^1\text{H}$  and  $^{13}\text{C}$  NMR spectra of PAMs in  $\text{CDCl}_3$ .

Fig. S2. The spatial configurations of PAMs with the minimized energy at gas state. The dihedral angles of PAMs between the mean plane described by the central CZ and the C=N group which calculated by Density-functional theory.

Fig. S3. UV-vis spectra changes of PAM1, PAM2, PAM4 and PAM5 respectively, in the  $\text{CH}_2\text{Cl}_2$  as they were protonated by HCl vapor in steps during the same time interval.

Fig. S4. UV-Vis absorption spectra change at 406 nm of PAM6 repeatedly placed in 1000 ppm HCl and  $\text{NH}_3$  vapor.

Fig. S5. Cyclic voltammtry for ferrocene and 9-(2-ethylhexyl)-carbazole-3,6- dicarboxaldehyde in  $\text{CH}_3\text{CN}$  containing 0.1mol/L  $\text{LiClO}_4$ , at a scan rate of 50 mV/s.

Fig. S6. Cyclic voltammograms of PAM3 (A) and PAM5 (B) film on the ITO-coated glass substrate in at different scan rates: (a) 10, (b) 20, (c) 40, (d) 60, (e) 80, and (f)100 (e) 120 mV/s. Inset: Relationship of anodic and cathodic current peaks as a function of scan rate.

Fig. S7. The differential pulse voltammogram (DPV) of PAM2, PAM3 and PAM5 in  $\text{CH}_3\text{CN}$  containing 0.1mol/L  $\text{LiClO}_4$ , at a scan rate of 50 mV/s.

Fig. S8. CVs of PAM3 and PAM5 measured at scan rates between 10 and 120 mV/s. Inset: Randles-Sevcik plot of the oxidation (●) peaks of PAM3 and PAM5 relative to ferrocene (■) measured in dichloromethane with 0.5 M  $\text{Bu}_4\text{ClO}_4\text{N}$  as supporting electrolyte. Inset: Relationship of anodic current peaks as a function of the square root scan rate.

Fig. S9. Electronic absorption spectra of film of PAM1, PAM3, PAM4 and PAM6 membrane respectively, in the process of electrochemical doped with 0.1 V potential intervals in  $\text{CH}_3\text{CN}$  containing 0.1mol/L  $\text{LiClO}_4$  as the supporting electrolyte (vs Ag/AgCl).

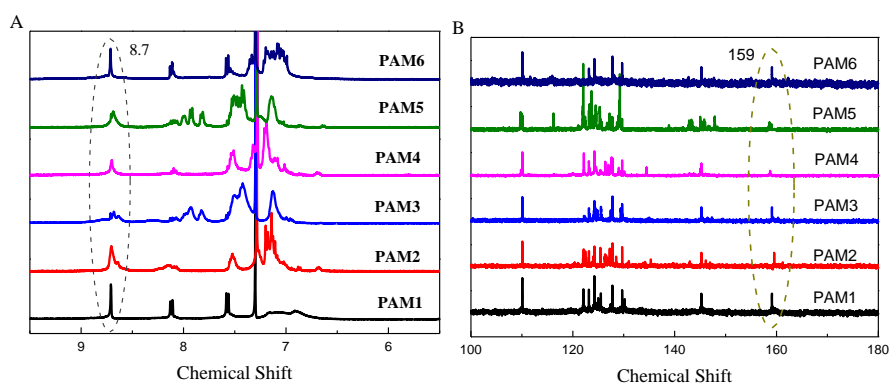

Fig. S1. The  $^1\text{H}$  and  $^{13}\text{C}$  NMR spectra of PAMs in  $\text{CDCl}_3$ .

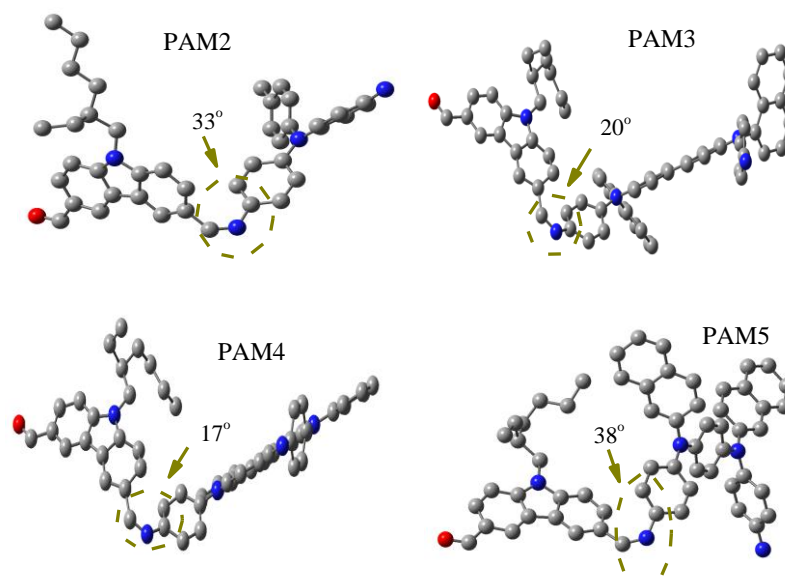

Fig. S2. The spatial configurations of PAMs with the minimized energy at gas state. The dihedral angles of PAMs between the mean plane described by the central CZ and the  $\text{C}=\text{N}$  group which calculated by Density-functional theory.

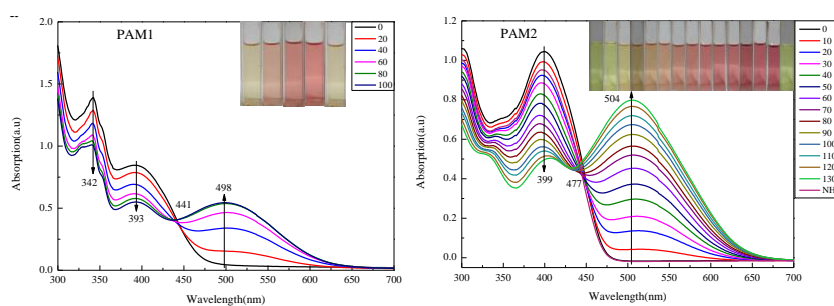

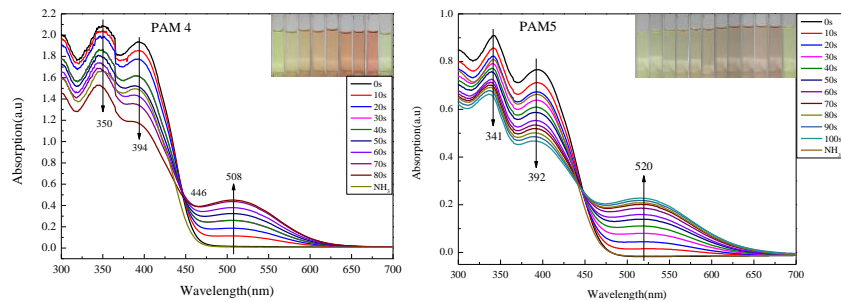

Fig. S3. UV-vis spectra changes of PAM1, PAM2, PAM4 and PAM5 respectively, in the CH<sub>2</sub>Cl<sub>2</sub> as they were protonated by HCl vapor in steps during the same time interval.

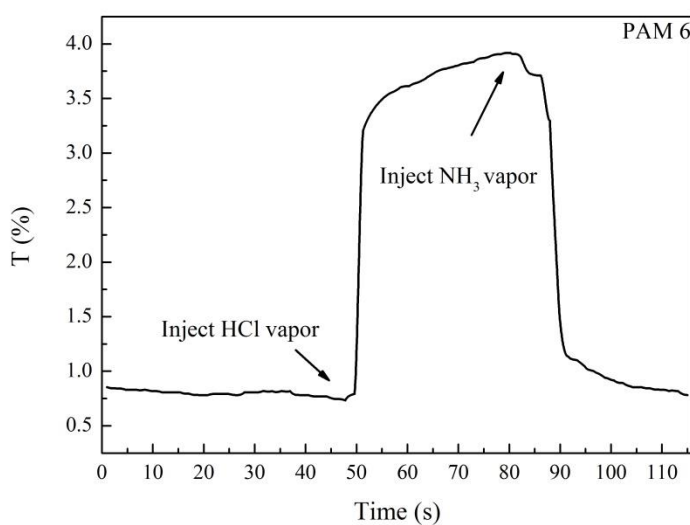

Fig. S4. UV-Vis absorption spectra change at 406 nm of PAM6 repeatedly placed in 1000 ppm HCl and NH<sub>3</sub> vapor.

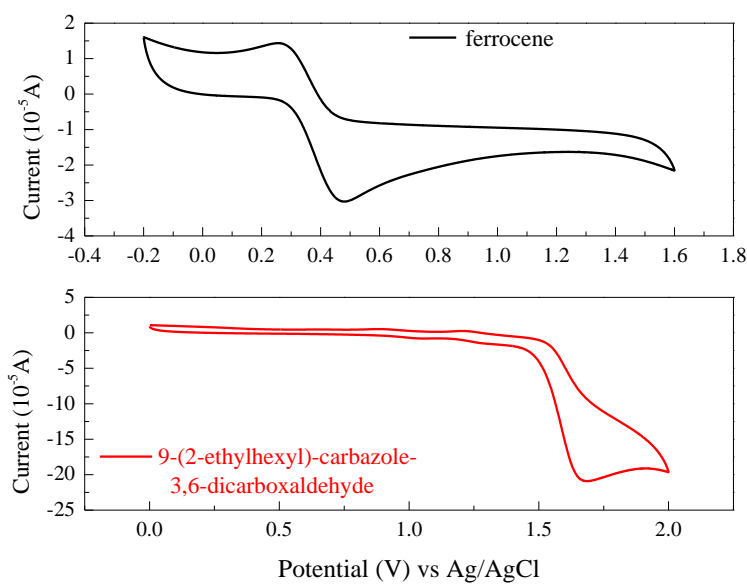

Fig. S5. Cyclic voltammetry for ferrocene and 9-(2-ethylhexyl)-carbazole-3, 6- dicarboxaldehyde in  $\text{CH}_3\text{CN}$  containing 0.1mol/L  $\text{LiClO}_4$ , at a scan rate of 50 mV/s.

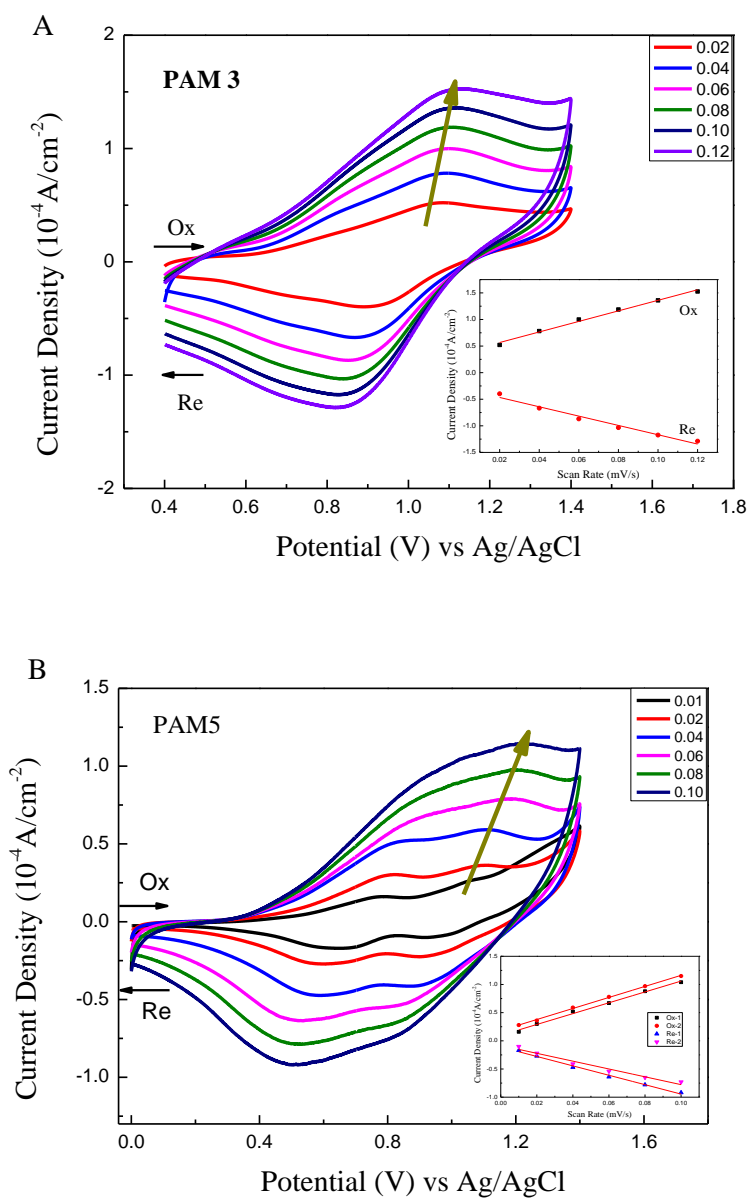

Fig. S6. Cyclic voltammograms of PAM3 (A) and PAM5 (B) film on the ITO-coated glass substrate in at different scan rates: (a) 10, (b) 20, (c) 40, (d) 60, (e) 80, and (f)100 (e) 120 mV/s. Inset: Relationship of anodic and cathodic current peaks as a function of scan rate.

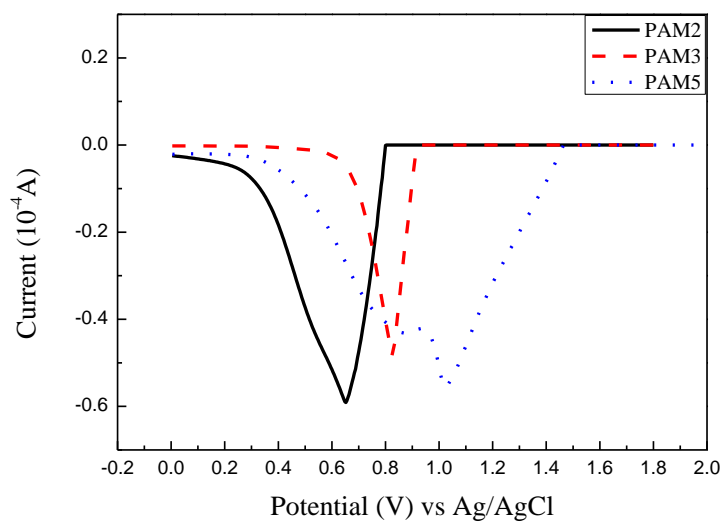

Fig. S7. The differential pulse voltammogram (DPV) of PAM2, PAM3 and PAM5 in  $\text{CH}_3\text{CN}$  containing 0.1 mol/L  $\text{LiClO}_4$ , at a scan rate of 50 mV/s.

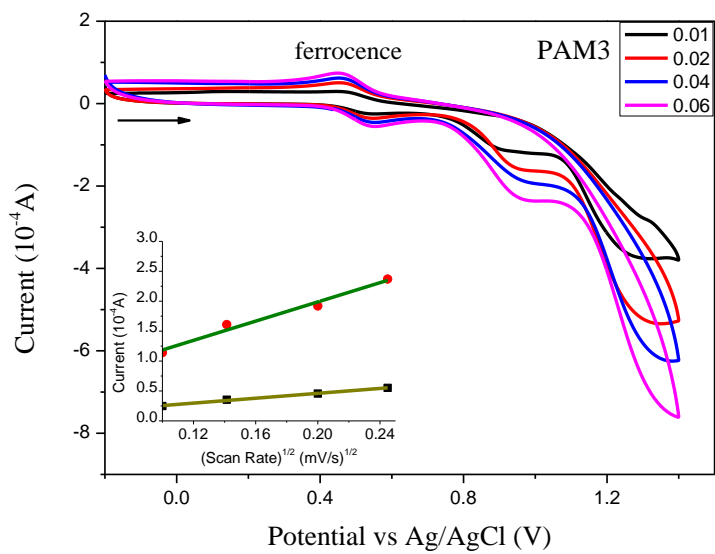

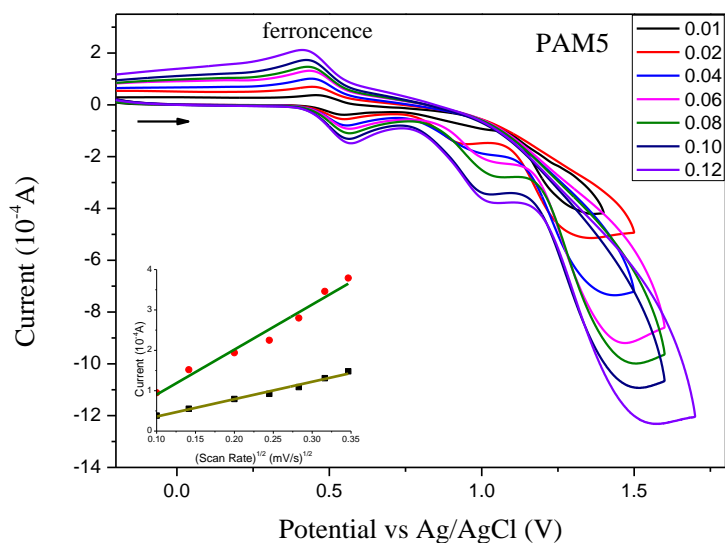

Fig. S8. CVs of PAM3 and PAM5 measured at scan rates between 10 and 120 mV/s. Inset: Randles–Sevcik plot of the oxidation (●) peaks of PAM3 and PAM5 relative to ferrocene (■) measured in dichloromethane with 0.5 M  $\text{Bu}_4\text{ClO}_4\text{N}$  as supporting electrolyte. Inset: Relationship of anodic current peaks as a function of the square root scan rate.

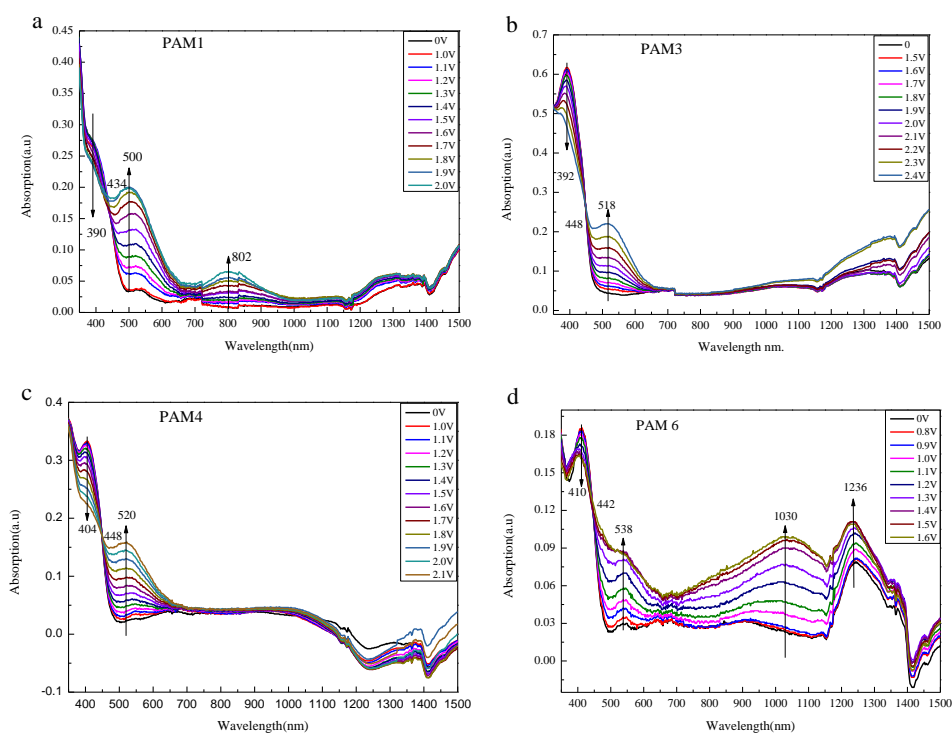

Fig. S9. Electronic absorption spectra of film of PAM1, PAM3, PAM4 and PAM6 membrane respectively, in the process of electrochemical doped with 0.1 V potential intervals in  $\text{CH}_3\text{CN}$  containing 0.1 mol/L  $\text{LiClO}_4$  as the supporting electrolyte (vs Ag/AgCl).
